# Supplementary material for: Non-invasive genetic monitoring for the threatened valley elderberry longhorn beetle
Source: PLoS One. 2020 Jan 17;15(1):e0227333. doi: 10.1371/journal.pone.0227333 (PMC6968946; doi:10.1371/journal.pone.0227333)
Supplement: S4 Table — (XLSX) [file pone.0227333.s004.xlsx]

## Sheet: Sheet1
S4 Table
		GenBank Accession Numbers
Subspecies	Sample ID	12S	16S	18S	COI
CELB	CAC01	MN196251	MN199309
CELB	CAC02	MN196252
CELB	CAC03	MN196253	MN199310
CELB	CAC04		MN199311
CELB	CAC05	MN196254	MN199312
CELB	CAC06	MN196255	MN199313
CELB	CAC07	MN196256	MN199314
CELB	CAC08	MN196257
CELB	CAC09	MN196258	MN199315
CELB	CAC10	MN196259
CELB	CAC11	MN196260	MN199316
CELB	LAC01	MN196261	MN199317
CELB	LAC05	MN196262	MN199318
CELB	LAC06	MN196263
CELB	LAC07	MN196264
CELB	LAC08	MN196265	MN199319
CELB	LAC09	MN196266	MN199320
CELB	LAC11	MN196267	MN199321
CELB	LAC12	MN196268	MN199322
CELB	LAC13	MN196269	MN199323
CELB	LAC14	MN196270	MN199324
CELB	LAC15	MN196271	MN199325
CELB	LAC16	MN196272	MN199326
CELB	LAC17	MN196273
CELB	UCRC1969	MN196274	MN199328	MN262466
CELB	UCRC1976	MN196275	MN199329	MN262465	MN267857
CELB	B-CELB1		MN199327
VELB	CAV01	MN196276	MN199330
VELB	CAV02	MN196277	MN199331
VELB	CAV03	MN196278	MN199332
VELB	CAV04		MN199333
VELB	CAV05	MN196279	MN199334
VELB	CAV06	MN196280	MN199335
VELB	CAV07	MN196281	MN199336
VELB	CAV08	MN196282	MN199337
VELB	CAV09	MN196283	MN199338
VELB	CAV10	MN196284	MN199339
VELB	CAV11	MN196285	MN199340
VELB	LAV02	MN196286	MN199341
VELB	LAV03	MN196287	MN199342
VELB	LAV04	MN196288	MN199343
VELB	VELB324	MN196289	MN199346	MN262463	MN267860, MN267861
VELB	VELB326	MN196290	MN199347	MN262464	MN267858, MN267863
VELB	BV1982	MN196291	MN199349	MN262460
VELB	BVM02	MN196292	MN199345	MN262462
VELB	BVF02	MN196293	MN199344	MN262461
VELB	B-VELB1		MN199348		MN267859, MN267862
