# Supplementary material for: Non-invasive genetic monitoring for the threatened valley elderberry longhorn beetle
Source: PLOS journal article supplement (doi:10.1371/journal.pone.0227333), 2020-01-17

# S1 Figure

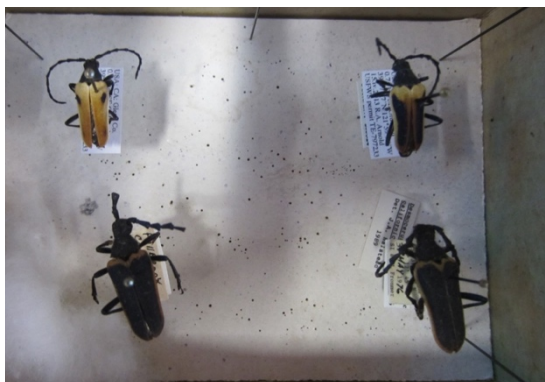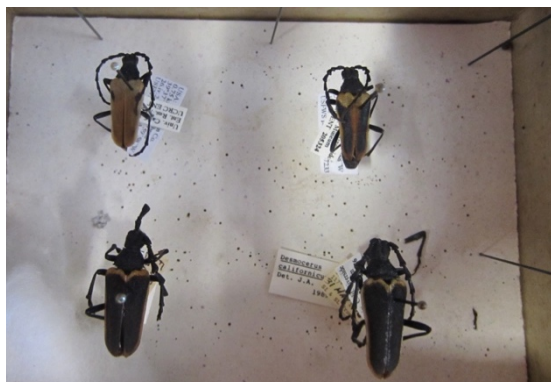

Supplement: S6 (10.1371/journal.pone.0227333.s006) [file journal.pone.0227333.s006]
